# Supplementary material for: A layered structure at the surface of P3HT/PCBM blends
Source: Royal Society of Chemistry journal article supplement (doi:10.1039/c1cp20734b), 2011-01-01
Supplement: c1cp20734b.pdf [file c1cp20734b.pdf]

Supplementary information

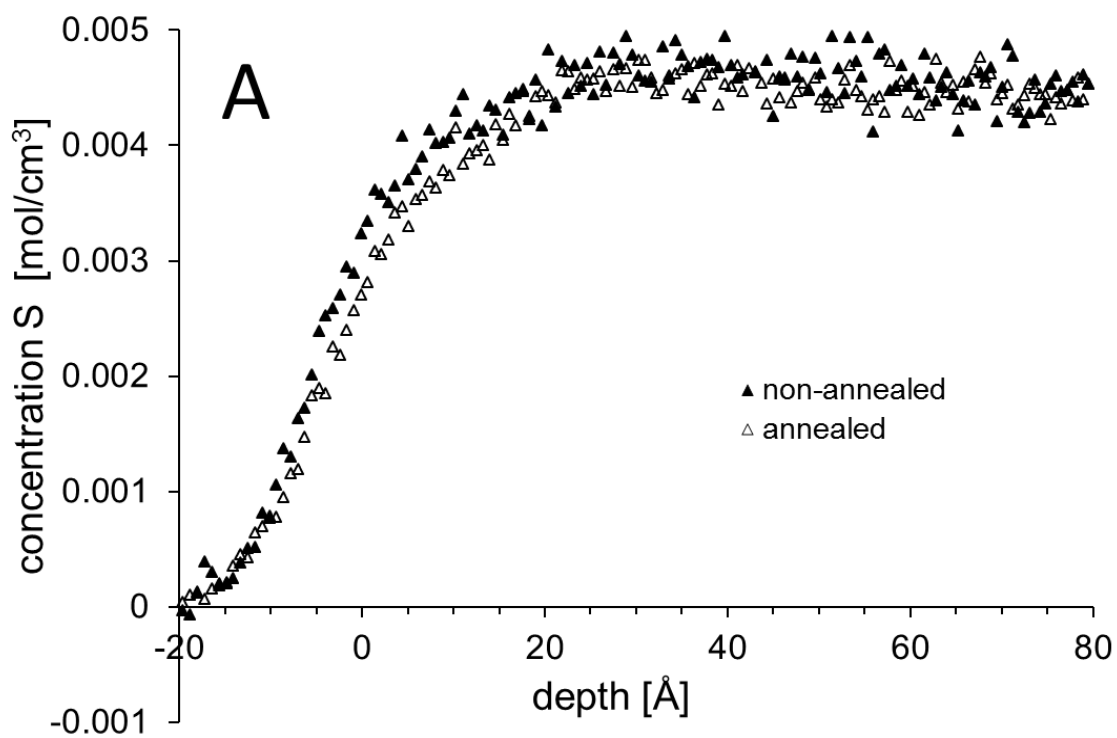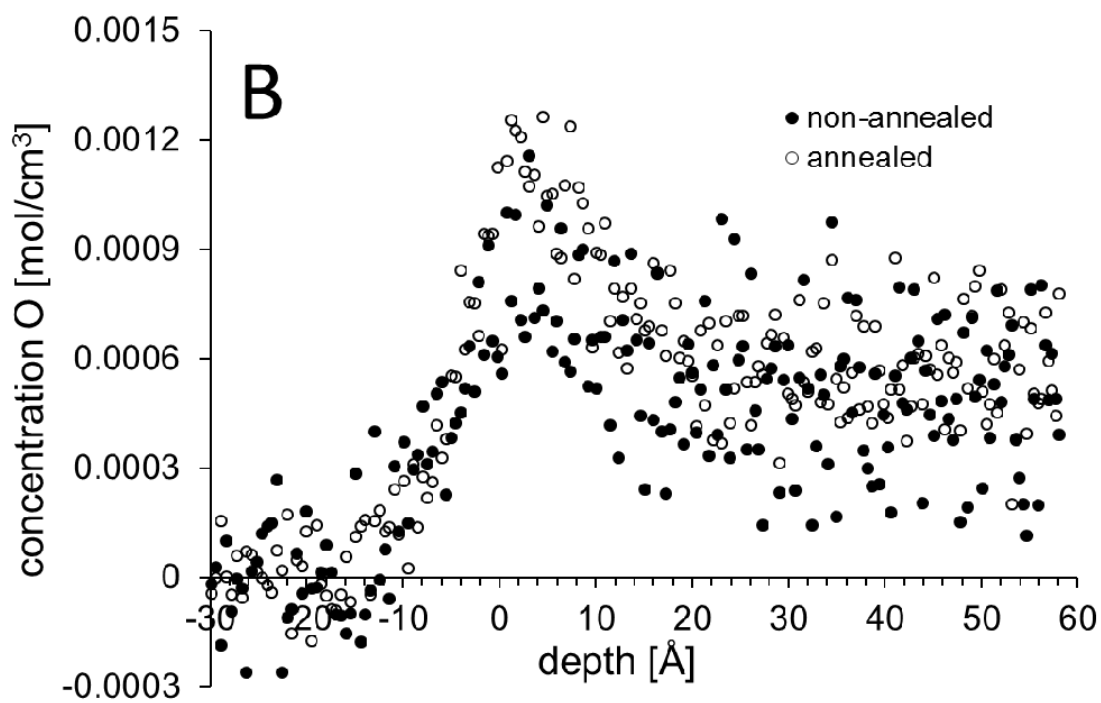

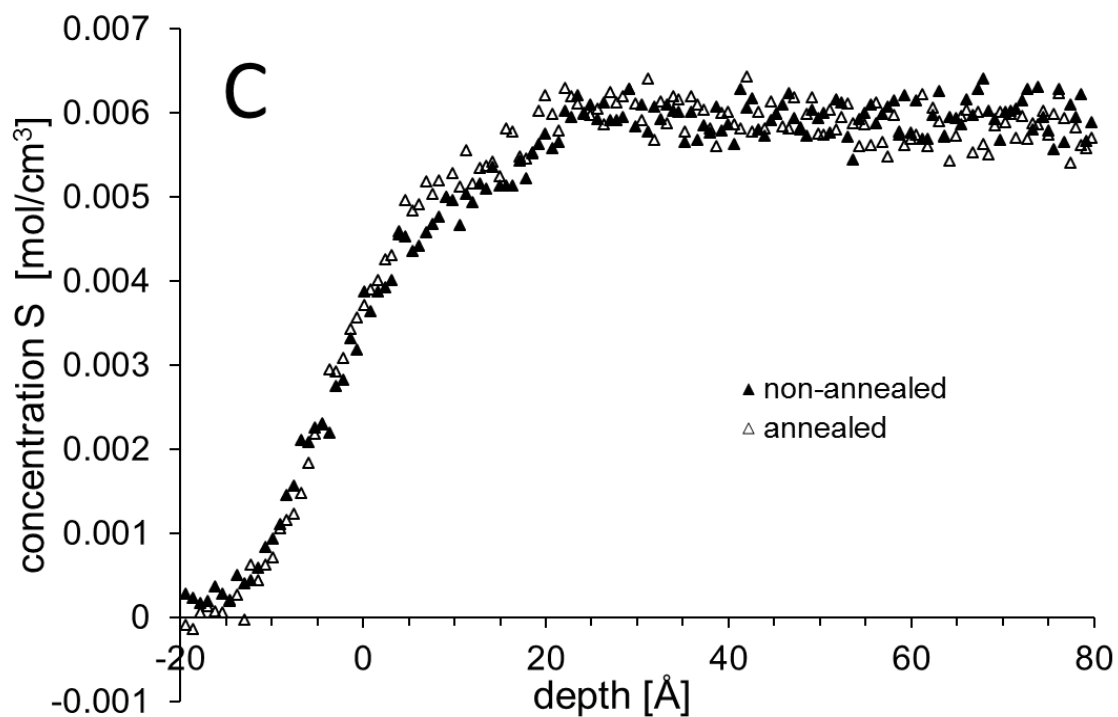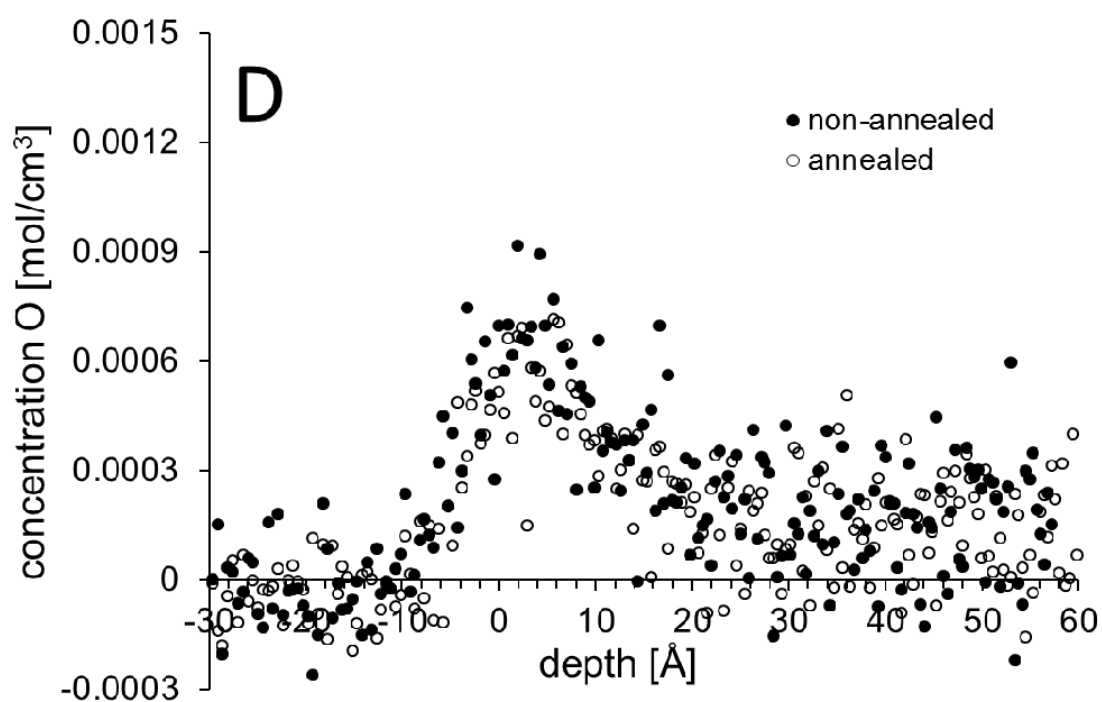

Figure 1S: Concentration depth profiles of A) sulphur and B) oxygen of the 40:60 P3HT:PCBM blend and concentration depth profiles of C) sulphur and D) oxygen of the 60:40 P3HT:PCBM blend.
